# Supplementary material for: Cryptic genetic variation enhances primate L1 retrotransposon survival by enlarging the functional coiled coil sequence space of ORF1p
Source: PubMed Central journal article supplement (PMC7449397; doi:10.1371/journal.pgen.1008991), 2020-08-14
Supplement: pgen.1008991.s002.pdf [file pgen.1008991.s002.pdf]

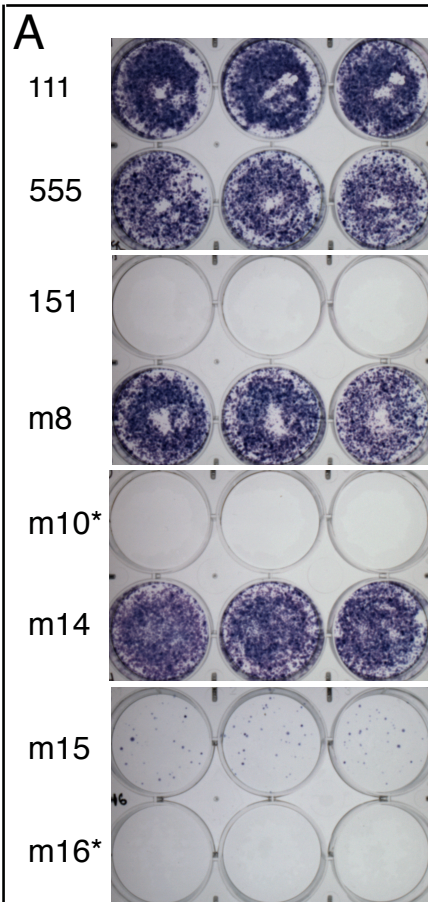

\*not presented in paper

**B**

| Wells    | ORF1p | Coverage(%) |
|----------|-------|-------------|
| 1 & 2:   | 111   | 97 & 97     |
| 3 & 4:   | 151   | no foci     |
| 5 & 6    | m15   | 0.7 & 0.7   |
| 7 & 8:   | m17   | no foci     |
| 9 & 10   | m18a  | 0.1 & 0.4   |
| 11 & 12: | m9    | no foci     |

**C**

| Wells   | ORF1p | Coverage(%) |
|---------|-------|-------------|
| 1 & 2   | 111   | 96 & 96     |
| 3 & 4   | 151   | no foci     |
| 5 & 6   | R105T | 0.6 & 0.7   |
| 7 & 8   | L107F | 0.4 & 3     |
| 9 & 10  | R108S | 3 & 0.3     |
| 11 & 12 | C111F | 2 & 4       |

**D**

| Wells | ORF1p | Coverage(%) |
|-------|-------|-------------|
| 1 & 2 | 111   | 75 & 73     |
| 3 & 4 | 151   | no foci     |
| 5 & 6 | m14   | 71 & 66     |
| 7     | m14   | 61          |
| 8     | m15   | 5           |
| 9     | m17   | 0.7         |
| 10    | m18a  | 0.8         |
| 11    | m9    | 0.4         |
| 12    | 111   | 67          |

**E**

| Wells   | ORF1p | Coverage(%) |
|---------|-------|-------------|
| 1 & 2   | 111   | 73 & 95     |
| 3 & 4   | 111a  | 83 & 91     |
| 5 & 6   | 151   | 0.1 & 2.7   |
| 7 & 8   | 151y  | 0.1 & 0.2   |
| 9 & 10  | 151xa | 0 & 1.3     |
| 11 & 12 | m28c  | 0.3 & 2     |
