# Supplementary material for: Cryptic genetic variation enhances primate L1 retrotransposon survival by enlarging the functional coiled coil sequence space of ORF1p
Source: PubMed Central journal article supplement (PMC7449397; doi:10.1371/journal.pgen.1008991), 2020-08-14

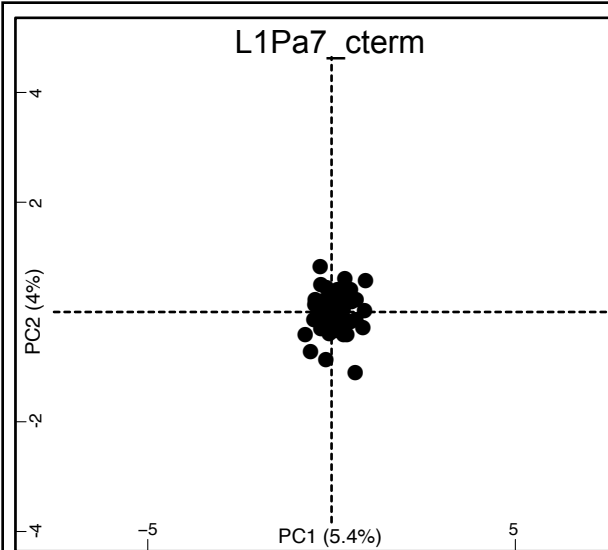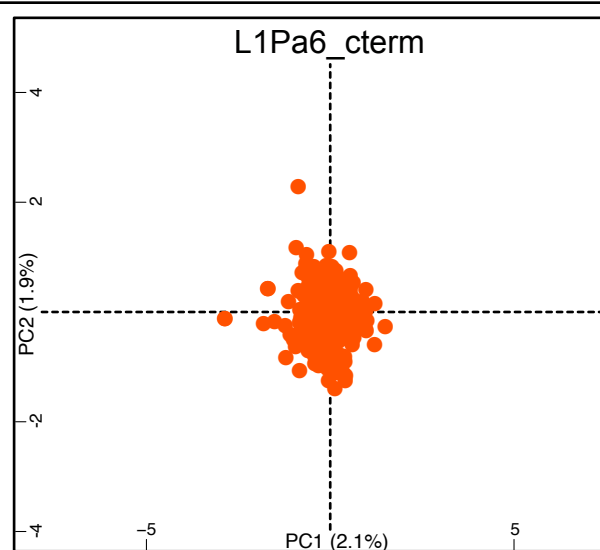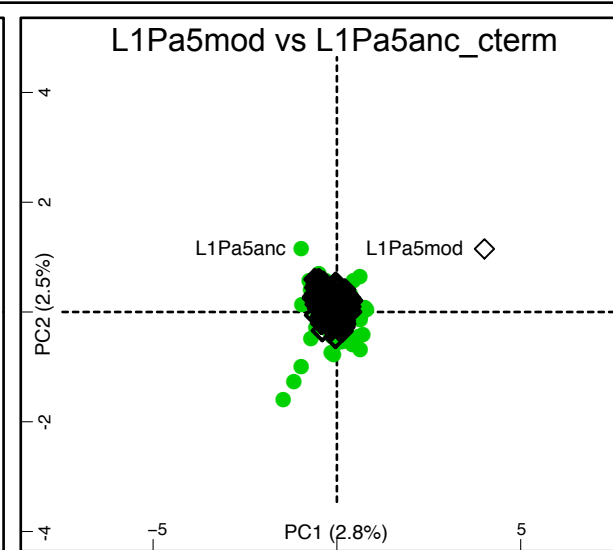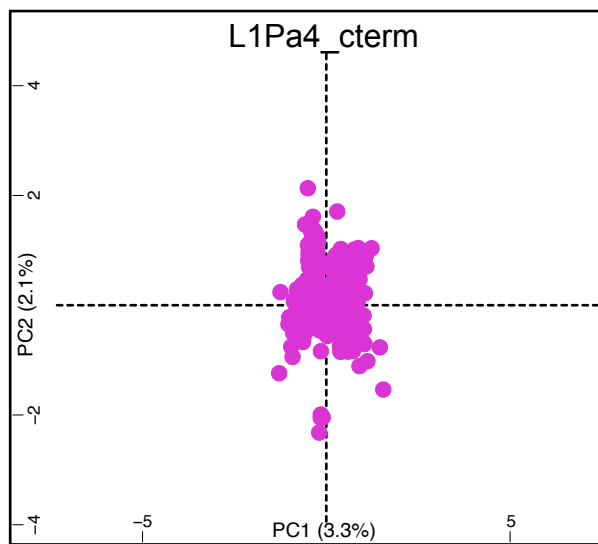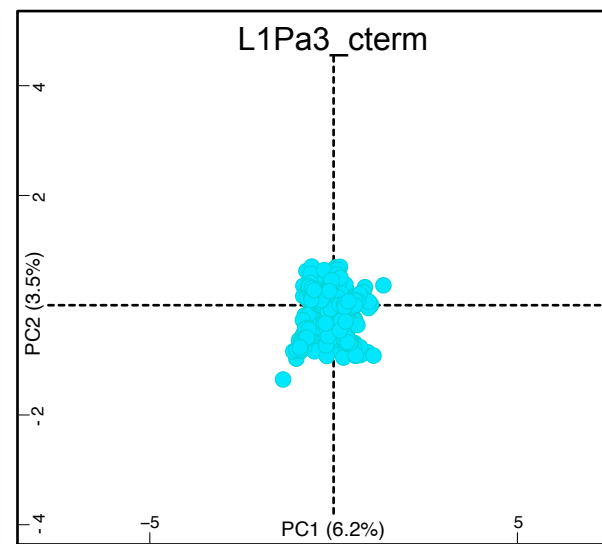

Supplement: pgen.1008991.s004.pdf [file pgen.1008991.s004.pdf]
