# Supplementary material for: Cryptic genetic variation enhances primate L1 retrotransposon survival by enlarging the functional coiled coil sequence space of ORF1p
Source: PubMed Central journal article supplement (PMC7449397; doi:10.1371/journal.pgen.1008991), 2020-08-14
Supplement: pgen.1008991.s005.pdf [file pgen.1008991.s005.pdf]

|        |         |     |       |         |        |    |     |       |      |     |            |         |        |         |         |      |           |         |         |         |         |      |      |
|--------|---------|-----|-------|---------|--------|----|-----|-------|------|-----|------------|---------|--------|---------|---------|------|-----------|---------|---------|---------|---------|------|------|
| 1.7_o  | SS-LKEH | VL  | TQ-KE | AKNLEKR | LE-LL  | TR | ITS | SLEKN | INDL | MEL | KNTA-EL-E  | AY      | TSINS- | IDQ-EER | ISE     | IEDQ | INEIK-EDK | IREKR   | MKRN-QS | LQE     | IWDY    |      |      |
| 1.7rt  | SSELKEH | VL  | TQCKE | AKNLEKR | LEEL   | TR | ITS | SLEKN | INDL | MEL | KNTAXEL    | XEA     | Y      | TSINSX  | IDQAEER | ISE  | IEDQ      | INEIKXE | DK      | IREKR   | MKRN    | EQS  |      |
| 3.7_o  | FS-LKEH | VL  | TH-KE | AKNLEKR | LD-WL  | TR | ITS | SVEKS | LNDL | MEL | KTTV-EL-E  | AY      | TSFNS- | FDQ-EER | ISV     | IEDQ | INEIK-EDK | IREKR   | VKRN-QS | LQE     | IWDY    |      |      |
| 3.7rt  | FSELKEH | VL  | THXKE | AKNLEKR | LDEWL  | TR | ITS | SVEKS | LNDL | MEL | KTTVXEL    | XEA     | Y      | TSFNSX  | FDQAEER | ISV  | IEDQ      | INEIKXE | DK      | IREKR   | VKRN    | EQS  |      |
| 1b.6_o | FS-LKEH | V-  | TH-KE | AKNLEKR | LD-WL  | TR | ITS | SVEKS | LNDL | MEL | KTTV-EL-E  | Y       | TSFNS- | FDQAEER | ISV     | IEDQ | INEIK-EDK | IREKR   | VKRN-QS | LQE     | IWDY    |      |      |
| 1b.6rt | FSELKEH | VL  | THXKE | AKNLEKR | LDEWL  | TR | ITS | SVEKS | LNDL | MEL | KTTVXEL    | XEA     | Y      | TSFNSX  | FDQAEER | ISV  | IEDQ      | INEIKXE | DK      | IREKR   | VKRN    | EQS  |      |
| 1c.6_o | FS-LKEH | V-  | TH-KE | AKNLEKR | LD-WL  | TR | INS | SVEKT | LNDL | MEL | KTTA-EL-D  | CT      | SFNS-  | FDQVEER | ISV     | IEDQ | INEIK-EDK | IREKR   | VKRN-QS | LQE     | IWDY    |      |      |
| 1c.6rt | FSELKEH | VL  | THXKE | AKNLEKR | LDEWL  | TR | INS | SVEKT | LNDL | MEL | KTTAXEL    | XDA     | CT     | SFNSX   | FDQVEER | ISV  | IEDQ      | INEIKXE | DK      | IREKR   | VKRN    | EQS  |      |
| 4.6_o  | FS-LKEH | V-  | TH-KE | AKNLEKR | LD-WL  | TR | INS | SVEKT | LNDL | MEL | KTMA-EL-D  | CT      | SFNS-  | FDQVEER | VSV     | IEDQ | INEIK-EDK | IREKR   | VKRN-QS | LQE     | IWDY    |      |      |
| 4.6rt  | FSELKEH | VX  | THXKE | AKNLEKR | LDEWL  | TR | INS | SVEKT | LNDL | MEL | KTMAXEL    | XDA     | CT     | SFNSX   | FDQVEER | VSV  | IEDQ      | INEIKXE | DK      | IREKR   | VKRN    | EQS  |      |
| 1a.6_o | FS-LKED | V-  | TH-KE | AKNLEKR | LD-WL  | TR | INS | SVEKT | LNDL | MEL | KTMA-EL-D  | CT      | SFNS-  | FDQVEER | VSV     | IEDQ | INEIK-E   | EKF     | IREKR   | VKRN-QS | LQE     | IWDY |      |
| 1a.6rt | FSELKED | VX  | THXKE | AKNLEKR | LDEWL  | TR | INS | SVEKT | LNDL | MEL | KTMAXEL    | XDA     | CT     | SFNSX   | FDQVEER | VSV  | IEDQ      | INEIKXE | EKF     | IREKR   | VKRN    | EQS  |      |
| 3.6_o  | FS-LKED | V-  | TH-KE | AKNLEKR | LD-WL  | TR | INS | SVEKT | LNDL | MEL | KTMA-EL-D  | CT      | SFSS-  | FDQVEER | VSV     | IEDQ | INEMK-E   | EKF     | IREKR   | VKRN-QS | LQE     | IWDY |      |
| 3.6rt  | FSELKED | VX  | THXKE | AKNLEKR | LDEWL  | TR | INS | SVEKT | LNDL | MEL | KTMAXEL    | XDA     | CT     | SFSSX   | FDQVEER | VSV  | IEDQ      | INEMKXE | EKF     | IREKR   | VKRN    | EQS  |      |
| 2.5_o  | FS-LKED | V-  | TH-KE | AKNLEKR | LD-WL  | TR | INS | -EKT  | LNDL | MEL | KTMA-EL-D  | CT      | SFSS-  | FDQVEER | VSV     | IEDQ | MNEMK-E   | EKF     | IREKR   | VKRN-QS | LQE     | IWDY |      |
| 2.5rt  | FSELKED | VX  | THXKE | AKNLEKR | LDEWL  | TR | INS | -EKT  | LNDL | MEL | KTMAXEL    | XDA     | CT     | SFSSX   | FDQVEER | VSV  | IEDQ      | MNEMKXE | EKF     | IREKR   | VKRN    | EQS  |      |
| 3.5_o  | FS-LKEE | V-  | TH-KE | AKNLEKR | LD-WL  | TR | ITS | SVEKS | LNDL | MEL | KTMA-EL-D  | CT      | SFSS-  | FDQLEER | VSV     | IEDQ | MNEMK-E   | EKF     | IREKR   | VKRN-QS | LQE     | IWDY |      |
| 3.5rt  | FSELKEE | VX  | THXKE | AKNLEKR | LDEWL  | TR | ITS | SVEKS | LNDL | MEL | KTMAXEL    | RDE     | CT     | SFSSX   | FDQLEER | VSV  | IEDQ      | MNEMKXE | EKF     | IREKR   | VKRN    | EQS  |      |
| 2.7_o  | FS-LKEE | VX  | TH-KE | VKNLEKR | LD-WL  | TR | IT  | NXEKX | LXDL | MEL | KTMA-EL-DE | CT      | SFSS-  | FDQ-EER | VSV     | XEDQ | MNEMK-E   | EKF     | IREKR   | XXRN-QS | LQE     | IWDY |      |
| 2.7rt  | FSELKEE | VX  | THXKE | VKNLEKR | LDEWL  | TR | IT  | NXEKX | LXDL | MEL | KTMAXEL    | RDE     | CT     | SFSSX   | FDQLEER | VSV  | XEDQ      | MNEMKXE | EKF     | IREKR   | XXRN    | EQS  |      |
| 2.6_o  | FS-LKEE | V-  | TH-KE | VKNLEKR | LD-WL  | TR | IT  | NAEKX | LKDL | MEL | KTMA-EL-D  | CT      | SFSS-  | FDQLEER | VSV     | MEDQ | MNEMK-E   | EKF     | IREKR   | IKRN-QS | LQE     | IWDY |      |
| 2.6rt  | FSELKEE | VQ  | THXKE | VKNLEKR | LDEWL  | TR | IT  | NAEKX | LKDL | MEL | KTMAXEL    | RDE     | CT     | SFSSX   | FDQLEER | VSV  | MEDQ      | MNEMKXE | EKF     | IREKR   | IKRN    | EQS  |      |
| 1.5_o  | FS-LKEE | V-  | TH-KE | VKNLEKR | LD-WL  | TR | IT  | NAEKX | LKDL | MEL | KTMA-EL-D  | CT      | SFSS-  | FDQLEER | VSV     | MEDQ | MNEMK-E   | EKF     | IREKR   | IKRN-QS | LQE     | IWDY |      |
| 1.5rt  | FSELKEE | VX  | THXKE | VKNLEKR | LDEWL  | TR | IT  | NAEKX | LKDL | MEL | KTMAREL    | RDE     | CT     | SFSSX   | FDQLEER | VSV  | MEDQ      | MNEMKXE | EKF     | IREKR   | IKRN    | EQS  |      |
| 3.4_o  | FS-LKEE | V-  | THGKE | VKNLEKR | LD-WL  | TR | IT  | NAEKX | LKDL | MEL | KT-A-EL-D  | CT      | SFSS-  | FDQLEER | VS-     | MED- | MNEMK-E   | EKF     | IREKR   | IKRN-QS | LQE     | IWDY |      |
| 3.4rt  | FSELKEE | VX  | THGKE | VKNLEKR | LDEWL  | TR | IT  | NAEKX | LKDL | MEL | KTMAREL    | XDE     | CT     | SFSSX   | FDQLEER | VS   | MEDQ      | MNEMKXE | EKF     | IREKR   | IKRN    | EQS  |      |
| 4.4_o  | YS-LKEE | V-  | THGKE | VKNLEK  | LD-WL  | TR | IT  | NAEKX | LKDL | MEL | KT-A-EL-D  | CT      | SLSS-  | FDQLEER | VS-     | MED- | MNEMK-E   | EKF     | IREKR   | IKRN-QS | LQE     | IWDY |      |
| 4.4rt  | YSELKEE | VR  | THGKE | VKNLEK  | LDEWL  | TR | IT  | NAEKX | LKDL | MEL | KTXAREL    | XDE     | CT     | SLSSX   | FDQLEER | VS   | MEDQ      | MNEMKXE | EKF     | IREKR   | IKRN    | EQS  |      |
| 2.3_o  | XS-L-EE | VX  | THGKE | VKNLEK  | LDEWL  | TR | IT  | NAEKX | LKDL | MEL | KTMA-EL-DE | CT      | SLSS-  | FDQLEER | VS-     | MEDQ | MNEMK-E   | EKF     | IREKR   | IKRN-QS | LQE     | IWDY |      |
| 2.3rt  | XSELKEE | VX  | THGKE | VKNLEK  | LDEWL  | TR | IT  | NAEKX | LKDL | MEL | KTMAREL    | XDE     | CT     | SLSSX   | FDQLEER | VS   | MEDQ      | MNEMKXE | EKF     | IREKR   | IKRN    | EQS  |      |
| 2.4_o  | YS-LKEE | V-  | TNGKE | VKNFEK  | LD-WI  | TR | IT  | NAEKX | LKDL | MEL | KT-A-EL-D  | CT      | SLSN-  | CDQLEER | VS-     | MED- | MNEMK-E   | EKF     | IREKR   | IKRN-QS | LQE     | IWDY |      |
| 2.4rt  | YSELKEE | VRT | TNGKE | VKNFEK  | LDEWI  | TR | IT  | NAEKX | LKDL | MEL | KTXAREL    | RDE     | CT     | SLSNX   | CDQLEER | VS   | MEDQ      | MNEMKXE | EKF     | IREKR   | IKRN    | EQS  |      |
| 1a.4_o | YS-LQEE | I-  | TNGKE | VKNFEK  | LD-WI  | TR | IT  | NAEKX | LKEL | MEL | KA-A-EL-E  | CR      | SLRS-  | CDQLEER | VS-     | MED- | MNEMK-E   | EGK     | FREKR   | IKRN-QS | LQE     | IWDY |      |
| 1a.4rt | YSELQEE | IQ  | TNGKE | VKNFEK  | LDEWI  | TR | IT  | NAEKX | LKEL | MEL | KAKAREL    | REE     | CR     | SLRSX   | CDQLEER | VS   | MEDQ      | MNEMKXE | EGK     | FREKR   | IKRN    | EQS  |      |
| 1b.4_o | YS-LQEE | I-  | TGKKE | VENFEK  | LD-CI  | TR | IT  | NTEK  | LKEL | MEL | KA-A-EL-E  | CR      | SLRS-  | CDQLEER | VS-     | MED- | MNEMK-E   | EGK     | FREKR   | IKRN-QS | LQE     | IWDY |      |
| 1b.4rt | YSELQEE | IQ  | TGKKE | VENFEK  | LDECIT | TR | IT  | NTEK  | LKEL | MEL | KAKAREL    | REE     | CR     | SLRSR   | CDQLEER | VS   | MEDQ      | MNEMKRE | EGK     | FREKR   | IKRN    | EQS  |      |
| 3.3_o  | YS-L-EE | IQ  | TGKKE | VENFEK  | LDECIT | TR | IT  | NTEK  | LKEL | MEL | KA         | A-EL-EE | CR     | SLRS-   | CDQLEER | VS-  | MEDE      | MNEMK-E | EGK     | FREKR   | IKRN-QS | LQE  | IWDY |
| 3.3rt  | YSELQEE | IQ  | TGKKE | VENFEK  | LDECIT | TR | IT  | NTEK  | LKEL | MEL | KAKAREL    | REE     | CR     | SLRSR   | CDQLEER | VS   | MEDQ      | MNEMKXE | EGK     | FREKR   | IKRN    | EQS  |      |
| 1.3_o  | YS-L-ED | IQ  | TGKKE | VENFEK  | LEECIT | TR | IT  | NTEK  | LKEL | MEL | KT         | A-EL-EE | CR     | SLRS-   | CDQLEER | VS-  | MEDE      | MNEMK-E | EGK     | FREKR   | IKRN-QS | LQE  | IWDY |
| 1.3rt  | YSELRED | IQ  | TGKKE | VENFEK  | LEECIT | TR | IT  | NTEK  | LKEL | MEL | KTKAREL    | REE     | CR     | SLRSR   | CDQLEER | VS   | MEDQ      | MNEMKRE | EGK     | FREKR   | IKRN    | EQS  |      |
| 1.2_o  | YSEL-ED | IQ  | TGKKE | VENFEK  | LEECIT | TR | IT  | NTEK  | LKEL | MEL | KT         | A-EL-EE | CR     | SLRS-   | CDQLEER | VS-  | MEDE      | MNEMK-E | EGK     | FREKR   | IKRN    | EQS  |      |
| 1.2rt  | YSELRED | IQ  | TGKKE | VENFEK  | LEECIT | TR | IT  | NTEK  | LKEL | MEL | KTKAREL    | REE     | CR     | SLRSR   | CDQLEER | VS   | MEDQ      | MNEMKRE | EGK     | FREKR   | IKRN    | EQS  |      |
| 1.1_o  | YSEL-ED | IQ  | TGKKE | VENFEK  | LEECIT | TR | IT  | NTEK  | LKEL | MEL | KT         | A-EL-EE | CR     | SLRS-   | CDQLEER | VS   | MEDQ      | MNEMK-E | EGK     | FREKR   | IKRN    | EQS  |      |
| 1.1rt  | YSELRED | IQ  | TGKKE | VENFEK  | LEECIT | TR | IT  | NTEK  | LKEL | MEL | KTKAREL    | REE     | CR     | SLRSR   | CDQLEER | VS   | MEDQ      | MNEMKRE | EGK     | FREKR   | IKRN    | EQS  |      |
