# Supplementary material for: Cryptic genetic variation enhances primate L1 retrotransposon survival by enlarging the functional coiled coil sequence space of ORF1p
Source: PubMed Central journal article supplement (PMC7449397; doi:10.1371/journal.pgen.1008991), 2020-08-14
Supplement: pgen.1008991.s008.pdf [file pgen.1008991.s008.pdf]

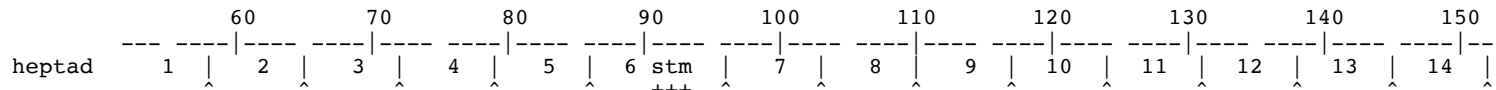

1.2\_o\_50%\_cn

YSEL-EDIQTKGKEVENFEKNLEECITRITNTEKCLKELMELKTKA-EL-EECRSLRS-C-QLEERVS-MEDEMNMK-EGKFREKRIKRNEQSLQEIWDY

2a\_chr19\_2\_1 F.....V\*.HH..AK.L..R.DKWL..NSV..S.ND.....I....DA.T.FN..F.KV.....I..Q.....E.....L.....  
 2a\_chrX\_3\_2 H.....EV\*.N....KH.X.KTDNSV....A..S..D.T.V..A....DK.L..ST.\*.....X.....E.....K.....  
 2a\_chr11\_4\_3 ..P.KEVR.H...K.L..K.D.WL....A..S..D....TT...D..T..S..F.....K.Q.....K.C...V..KK.....  
 2a\_chr16\_5\_4 ..K...EVR.N...K.L..K.D\*WL....E..S..D....AM...D..T..S.....K.....D.....I.....K...C  
 2a\_chr6\_6\_5 .....E.\*.N....K.LX.K.D.WL....A..S..D....V...I.D..T..S.....A.....E.....G..S...FP.....  
 2a\_chrY\_7\_6 .....K.....S...T.....K.....E.....  
 2a\_chrX\_8\_7 .C...E.....K..G..D.R.P.....A.....T.....R.....  
 2a\_chr2\_9\_8 F.....VR.QR..AK.C..R.DKWL...SV..S.ND..D...ME...DA.T.FS..F...KX...T..Q.....E.....V.....H  
 2a\_chrY\_10\_9 .P...E.....K.L...DK...G...Q.....D..A.V.....F.....G..V...N.....  
 2a\_chr3\_11\_10 \*......E.....D.....K.....T.V...A.....  
 2a\_chrX\_12\_11 .....N.....X.....V.....S.....ID.....SE.  
 2a\_chr5\_13\_12 .....\*...R.....\*  
 2a\_chr8\_14\_13 .....L.....R.....  
 2a\_chr2\_15\_14 .....\*.....  
 2a\_chr15\_16\_15 .....H.....V.....D.....N.....  
 2a\_chr6\_17\_16 .....  
 2a\_chr5\_18\_17 .....  
 2a\_chr9\_19\_18 .....D.....  
 2a\_chr9\_20\_19 .....D.....S.....M.....  
 2a\_chr6\_21\_20 .....T.....  
 2a\_chrX\_22\_21 .....  
 2a\_chr3\_23\_22 .P...K.....R.....  
 2a\_chr6\_24\_23 .....K.....TV.....R.....  
 2a\_chr5\_25\_24 .....K.....K.....  
 2a\_chr3\_26\_25 .....GC  
 2a\_chr2\_27\_26 .....N...D.....  
 2a\_chr13\_28\_27 .....G...Q.....  
 2a\_chr14\_29\_28 .....D...V.....  
 2a\_chr9\_30\_29 .....S.....  
 2a\_chr11\_31\_30 .C.....R.....G.....  
 2a\_chr2\_32\_31 .....V.....  
 2a\_chr10\_34\_33 .....D.R.....Q.....  
 2a\_chr7\_35\_34 .....\*.....X.....  
 2a\_chr4\_36\_35 .....R...D.....  
 2a\_chr8\_37\_36 .....V.....  
 2a\_chr4\_38\_37 .....S.....\*.....Q...P..T...  
 2a\_chr3\_39\_38 .....X.....S.....  
 2a\_chr9\_40\_39 .....D.....  
 2a\_chr4\_41\_40 .....K.....A.....  
 2a\_chr3\_42\_41 .....S.....  
 2a\_chr7\_43\_42 .....Q...F...S.....  
 2a\_chr13\_44\_43 .....R.....  
 2a\_chr2\_45\_44 .....\*.....  
 2a\_chr2\_46\_45 .....I.....  
 2a\_chr8\_47\_46 .....N.....  
 2a\_chr7\_48\_47 .....L...L.....  
 2a\_chr6\_49\_48 .....A.....H.....V.....  
 2a\_chr2\_50\_49 .....T.....R.....  
 2a\_chr3\_51\_50 .....T.....  
 2a\_chr3\_52\_51 .....A.....K.....  
 2a\_chr18\_53\_52 .....R.....  
 2a\_chr16\_54\_53 .A.....\*...E.  
 2a\_chr4\_55\_54 .....K.....E.....  
 2a\_chr4\_56\_55 .....T...S.....G.....  
 2a\_chr7\_57\_56 .....  
 2a\_chr12\_58\_57 .....E.....



















```

1.2_o_50%_cn      YSEL-EDIQTKGKEVENFEKNLEECITRITNTKELMELKTKA-EL-EECRSLRS-C-QLLEERVS-MEDEMNEMK-EGKFREKRIKRNEQSLQEIWDY
2b_chrX_154_571   .....E.....S.....A.....Q.....
2b_chr7_155_572   .....Y.....
2b_chr7_156_573   .....M.....L.....S.....
2b_chr2_157_574   .....G.....T.....
2b_chr3_158_575   .....T.....
2b_chr8_159_576   .....E.....H.....I.....K.....G.....Q.....K.....
2b_chr14_160_577  ...P.....K.....Y.....D.....
2b_chr7_161_578   .....X.....
2b_chrY_162_579   .....V.....I.....T.....H.....Y.....
2b_chr11_163_580  .....R.....
2b_chr3_164_581   .....
2b_chr9_165_582   .....
2b_chr7_166_583   .....S.....R.....V.....
2b_chr8_167_584   .....E.....
2b_chr6_168_585   .....*.....V.....
2b_chr16_169_586  .....S.....T.....S.....I.....Q.....
2b_chr4_170_587   .....I.....G.....
2b_chr5_171_588   .....A.....M.....R.....V.....S.....
2b_chrX_172_589   .....*.....
2b_chr7_173_590   .....GG.....G.....H.....
2b_chr14_174_591  ...D...I...G...I...W...X...
2b_chr18_175_592  .....K.....R.....E.....K.....
2b_chr3_176_593   .....X.....
2b_chrX_177_594   .....K.....S.....S.....
2b_chr11_178_595  .....
2b_chr5_179_596   .....V.....I.....R.....
2b_chr3_180_597   .....I.....
2b_chr8_181_598   .....T.....G.....
2b_chr11_182_599  .....G.....R.....S.....
2b_chr3_183_600   .Y...T.....
2b_chrX_184_601   .....K.....
2b_chrY_185_602   .....
2b_chr2_186_603   .....L.....D.....
2b_chr7_187_604   .....R.....L.....
2b_chr1_188_605   .....T.....D.....
2b_chr1_189_606   .....D.....R.....
2b_chr17_190_607  .....R.....S.....
2b_chr1_191_608   .....K.....
2b_chr20_192_609  .....
2b_chr11_193_610  .....*D...I.....K.....
2b_chrX_194_611   .....
2b_chr3_195_612   .....D.....
2b_chr4_196_613   .....T.....V.....F.....L.....
2b_chr13_197_614  .....Y.....I.....
2b_chr8_198_615   .....E.....F.....Q.....Q.....I.....
2b_chr8_199_616   .....L.L.....R.....
2b_chr1_200_617   .....L.....V.....
2b_chr2_201_618   .....D.....*.....
2b_chr4_202_619   .....T.....Q.....K.....
2b_chr2_203_620   .....*.....G.....
2b_chr3_204_621   .....Q.....
2b_chr4_205_622   .....K.....
2b_chr21_206_623  ...K.....K.....K.....C
2b_chr2_207_624   .....P.....T.....
2b_chr2_208_625   .....N.....R.....
2b_chr15_209_626  .....D.....S.....Q.....V.....R.....K.....
2b_chr2_210_627   .....X.....R.....
2b_chr6_211_628   .....I.....
2b_chr11_212_629  ...D...TR...A...T...*.....
2b_chr9_213_630   .....K.....*.....Y.....
2b_chr4_214_631   .....D.....SI.....
2b_chr2_215_632  X.....C.*.....D.....
2b_chr3_216_633   .....
2b_chr20_217_634  .....T.....G.N.K.....E.....

```
