# Supplementary material for: Cryptic genetic variation enhances primate L1 retrotransposon survival by enlarging the functional coiled coil sequence space of ORF1p
Source: PubMed Central journal article supplement (PMC7449397; doi:10.1371/journal.pgen.1008991), 2020-08-14
Supplement: pgen.1008991.s009.pdf [file pgen.1008991.s009.pdf]

1.2\_o\_50%\_cn  
a\_L1PA2\_62\_58  
a\_L1PA2\_63\_59  
a\_L1PA2\_64\_60  
a\_L1PA2\_65\_61  
a\_L1PA2\_66\_62  
a\_L1PA2\_67\_63  
a\_L1PA2\_68\_64  
a\_L1PA2\_69\_65  
a\_L1PA2\_70\_66  
a\_L1PA2\_71\_67  
a\_L1PA2\_73\_68  
a\_L1PA2\_74\_69  
a\_L1PA2\_75\_70  
a\_L1PA2\_76\_71  
a\_L1PA2\_77\_72  
a\_L1PA2\_78\_73  
a\_L1PA2\_79\_74  
a\_L1PA2\_80\_75  
a\_L1PA2\_81\_76  
a\_L1PA2\_82\_77  
a\_L1PA2\_83\_78  
a\_L1PA2\_85\_79  
a\_L1PA2\_86\_80  
a\_L1PA2\_87\_81  
a\_L1PA2\_89\_82  
a\_L1PA2\_90\_83  
a\_L1PA2\_91\_84  
a\_L1PA2\_92\_85  
a\_L1PA2\_93\_86  
a\_L1PA2\_94\_87  
a\_L1PA2\_95\_88  
a\_L1PA2\_96\_89  
a\_L1PA2\_97\_90  
a\_L1PA2\_98\_91  
a\_L1PA2\_99\_92  
a\_L1PA2\_100\_93  
a\_L1PA2\_101\_94  
a\_L1PA2\_102\_95  
a\_L1PA2\_103\_96  
a\_L1PA2\_104\_97  
a\_L1PA2\_105\_98  
a\_L1PA2\_106\_99  
a\_L1PA2\_107\_100  
a\_L1PA2\_108\_101  
a\_L1PA2\_109\_102  
a\_L1PA2\_110\_103  
a\_L1PA2\_111\_104  
a\_L1PA2\_112\_105  
a\_L1PA2\_113\_106  
a\_L1PA2\_114\_107  
a\_L1PA2\_116\_108  
a\_L1PA2\_117\_109  
a\_L1PA2\_118\_110  
a\_L1PA2\_119\_111  
a\_L1PA2\_120\_112  
a\_L1PA2\_121\_113  
a\_L1PA2\_123\_114  
a\_L1PA2\_124\_115  
a\_L1PA2\_125\_116  
a\_L1PA2\_126\_117  
a\_L1PA2\_127\_118  
a\_L1PA2\_128\_119  
a\_L1PA2\_131\_120  
a\_L1PA2\_132\_121

YSELREDIQTKGEVENFEKNLEECITRITNTKELMELKTKARELRECVSALRSRCDQLEERVSAEMEMNEMKREGKFRKRIKRNEQSLQEIWDY  
-----  
.....K.....  
.....K.....V.....  
.....L.....\*.....  
.....R.....V.....  
.....A.....  
.....T.....  
.....D.....N.....  
.....K.....Q.....T.....V.....  
.....G.....K.....K.....  
.....C.R.....N.....Q.....R.....K.....  
.....G.....G.....R.....  
.....D.W.....K.....K.....Q.GK.....  
.....X.....D.....V.....K.....E.....  
.....M.....  
.....Y.....G.....V.....  
.....Q.....\*.....  
.....M.....H.....D.....  
.....\*.....V.....  
.....S.....E.....I.....F.....  
.....T.....T.....  
.....I.....V.....\*.....  
N.....I.....T.....  
.....D.....E.....P.....  
.....\*.....R.L.K.....E.....  
.....T.....K.....D.....E.....  
.....G.....  
.....D.....T.....  
.....\*.....K.....G.....  
.....C.....D.....V.....V.....  
.....I.....  
.....Q.R.....  
.....K.....E.....Q.....Q.GX.....K.....C.....  
.....E.....A.....D.....S.....A.....Q.....G.....V.....E.....K.....  
.....K.....\*.....A.V.....Q.....  
.....S.....I.....P.D.....X.....  
.....X.....Q.....D.....L.I.....I.....G.....\*.....E.....  
.....D.....I.....M.....V.....R.....T.....E.....  
.....F.....V.P.\*.....  
.....E.....N.....KS.....K.....W.....A.S.D.....I.....D.....HS.....V.....E.....S.....N.....D.....  
.....I.....V.....G.....M.N.....  
.....P.....X.....  
.....D.....N.....\*.....V.....  
\*K.-KEVR.H.....K.L.K.DKWL.....A.S.D.....D.T.S.-F.....V.....E.....  
.....K.....V-K.....P.....K.....I.....

```

1.2_o_50%_cn      YSELREDIQTKEVENFEKNLEECITRITNTKELKELMELKTKARELREECRSLRRCQLEERVVSAMEDEMNMKREGKFKREKRIKRNEQSLQEIWIDY
a_L1PA2_134_122  -----L-----
a_L1PA2_135_123  .....K...V.....K.....
a_L1PA2_136_124  .....X.....I.....
a_L1PA2_137_125  .....G.V...G.....
a_L1PA2_140_126  .....Q.....K.....
a_L1PA2_141_127  .....E.....V.....
a_L1PA2_142_128  .....A.....G.....
a_L1PA2_143_129  .....V.....G.....
a_L1PA2_144_130  .....V.....G.....
a_L1PA2_145_131  .....V.....G.....
a_L1PA2_146_132  .....V.....G.....
a_L1PA2_147_133  .....
a_L1PA2_148_134  .....*.....M.....K.T.....
a_L1PA2_149_135  .....ET.....T.D.....A.T.....V.....D.....
a_L1PA2_150_136  .....R.....D.....*.....
a_L1PA2_151_137  .....V.....KM.I.....Q.K...R.....
a_L1PA2_152_138  .....L.....I.....L.....
a_L1PA2_153_139  .....S.....F.....E.....
a_L1PA2_154_140  .....R.S.....
a_L1PA2_155_141  .....S.....P.....
a_L1PA2_156_142  .....N.....I.....G.....
a_L1PA2_157_143  .....H.....
a_L1PA2_158_144  .....E.....G.....I.....G.AN.X.....
a_L1PA2_160_145  .....X.....H...R.....T.V.....
a_L1PA2_161_146  .....Q.....
a_L1PA2_162_147  .....K.....R.....I.....
a_L1PA2_163_148  .....K.....X.....
a_L1PA2_164_149  .....X.....D.....R.....P.....
a_L1PA2_165_150  .....G.....
a_L1PA2_166_151  .....V.....N.....K.....E.....
a_L1PA2_167_152  .....T.....G.K.Q.....
a_L1PA2_168_153  .....X.....G.....
a_L1PA2_169_154  .....D.....
a_L1PA2_170_155  .....V.....K.....
a_L1PA2_171_156  .....S.....S.....E...K.....*.....
a_L1PA2_172_157  .....S.....*.....R.....KK.....K.....
a_L1PA2_174_158  .....A.....R.....
a_L1PA2_176_159  .....G.....T.....
a_L1PA2_177_160  .....*.....C.....
a_L1PA2_178_161  .....D.....
a_L1PA2_179_162  .....T.....
a_L1PA2_180_163  .....N...S.....K.M.....V.....N...I.....
a_L1PA2_181_164  .....N.....I.....
a_L1PA2_182_165  .....
a_L1PA2_183_166  .....Q.....
a_L1PA2_184_167  .....D.....
a_L1PA2_185_168  .....A.....S.....
a_L1PA2_188_169  X.....K...V.....
a_L1PA2_189_170  C.....N.....G.S.....Y.....K.....H.....
a_L1PA2_190_171  .....C.....
a_L1PA2_191_172  .....D.M.....
a_L1PA2_192_173  .....R.....
a_L1PA2_193_174  .....
a_L1PA2_194_175  .....V.....N.....R.....
a_L1PA2_195_176  .....H.....*.....A.....
a_L1PA2_196_177  .....S.GN.....*.....
a_L1PA2_197_178  .....S.S.....T.....
a_L1PA2_198_179  .....Q.....K.....
a_L1PA2_199_180  C.....
a_L1PA2_201_181  .....T.Y.....
a_L1PA2_202_182  N.....Y.....I.R.....
a_L1PA2_203_183  .....R.....G.I.....N.....
a_L1PA2_204_184  .....V.....
a_L1PA2_205_185  .....S.....K.....

```

1.2\_o\_50%\_cn YSELREDIQTKGKEVENFEKNLEEICITRITNTKELKELMELKTKARELREECRSLRRCDCQLEERVVSAMEDEMNMKREGKFRKRIKRNQSLQEIWDY  
a\_L1PA2\_206\_186 .....X.....++++.....V.....  
a\_L1PA2\_207\_187 .....D.....\*.....  
a\_L1PA2\_208\_188 .....Y.....  
a\_L1PA2\_209\_189 .....G.....D.....R.....V.....Q.....\*.....  
a\_L1PA2\_210\_190 .....D.....M.....Y.....Q.....  
a\_L1PA2\_211\_191 .....D.....Q.....S.....  
a\_L1PA2\_212\_192 .....K.....T.....T.....  
a\_L1PA2\_213\_193 .....K.....K.....S.....D.....  
a\_L1PA2\_214\_194 .....X.....V.....K.....D.....K.....E.....  
a\_L1PA2\_216\_195 .....V.....X.....Q.....D.....V.....  
a\_L1PA2\_217\_196 .....V.....L.....  
a\_L1PA2\_219\_197 .F.....K.....  
a\_L1PA2\_220\_198 .....P.....N.....  
a\_L1PA2\_221\_199 .D.....  
a\_L1PA2\_222\_200 .....S.Q.F.\*L.....P.....H.....S.....  
a\_L1PA2\_223\_201 .....E.....V.....K.....X.G.....  
a\_L1PA2\_224\_202 .....E.....K.....R.....T.....T.....N.....M.....  
a\_L1PA2\_225\_203 .....D.....  
a\_L1PA2\_226\_204 .T.....A.....D.....  
a\_L1PA2\_227\_205 .....V.....K.....  
a\_L1PA2\_228\_206 .....A.....R.....V.....N.....  
a\_L1PA2\_229\_207 S.....H.....K.....  
a\_L1PA2\_230\_208 .....R.....  
a\_L1PA2\_231\_209 .V.....\*.....  
a\_L1PA2\_232\_210 .....  
a\_L1PA2\_233\_211 .....  
a\_L1PA2\_234\_212 .....\*.....I.R.....  
a\_L1PA2\_235\_213 .....  
a\_L1PA2\_236\_214 .....S.....  
a\_L1PA2\_237\_215 .....S.....G.....  
a\_L1PA2\_238\_216 .....T.....E.....  
a\_L1PA2\_239\_217 .....  
a\_L1PA2\_240\_218 .....V.....W.....G.....  
a\_L1PA2\_241\_219 .....R.....A.....  
a\_L1PA2\_242\_220 .....V.....V.....L.....V.....  
a\_L1PA2\_243\_221 .....G.....  
a\_L1PA2\_244\_222 .....T.....I.....T.....  
a\_L1PA2\_246\_223 .....R.....  
a\_L1PA2\_247\_224 .....T.....Y.G.....\*.....  
a\_L1PA2\_248\_225 .....I.....R.....  
a\_L1PA2\_250\_226 .....T.....N.....  
a\_L1PA2\_251\_227 .....X.....X.....I.....  
a\_L1PA2\_252\_228 .....K.....  
a\_L1PA2\_253\_229 .....K.....NT.....H.....I.....  
a\_L1PA2\_254\_230 .....I.....K.....  
a\_L1PA2\_255\_231 .....G.....  
a\_L1PA2\_256\_232 .....N.....V.....T.....  
a\_L1PA2\_257\_233 .....I.....T.....LH.....  
a\_L1PA2\_258\_234 .....  
a\_L1PA2\_259\_235 .....D.....V.....Q.....  
a\_L1PA2\_260\_236 .....\*.....D.....K.....V.....  
a\_L1PA2\_261\_237 .....K.....R.....  
a\_L1PA2\_262\_238 .....X.....K.....X.....  
a\_L1PA2\_263\_239 .....I.....\*.....  
a\_L1PA2\_264\_240 .....FV.....I.....  
a\_L1PA2\_266\_241 .....Y.....I.....  
a\_L1PA2\_267\_242 .....Q.....N.....  
a\_L1PA2\_268\_243 .....I.....I.....  
a\_L1PA2\_269\_244 .....G.....G.....D.....T.....N.....  
a\_L1PA2\_270\_245 .....I.....T.....V.....  
a\_L1PA2\_271\_246 .....G.....V.....  
a\_L1PA2\_272\_247 .Y.....Q.....Q.\*.....  
a\_L1PA2\_273\_248 .....Y.S.I.....N.....G.....N.....  
a\_L1PA2\_275\_249 .....V.....D.....R.....



```

1.2_o_50%_cn      YSELREDIQTKGKEVENFEKNLEECITRITNTKELMELKTKARELREECRSLRRCQLEERVVSAMEDEMNMKREGKFKREKRIKRNEQSLQEIWDY
a_L1PA2_356_314  -----V-----^-----^-----^-----^-----^-----^-----^-----^-----^-----^
a_L1PA2_357_315  .....D.....
a_L1PA2_358_316  .....Y.....T.....T.....
a_L1PA2_359_317  .....T.....T.....
a_L1PA2_360_318  .....D.T.....D.....
a_L1PA2_362_319  .....K.....K.X.....
a_L1PA2_364_320  .....G.....
a_L1PA2_365_321  .....V.....K.....I.....N.....V.....
a_L1PA2_366_322  .....I.....
a_L1PA2_367_323  .....*.....
a_L1PA2_368_324  .....E.S.....T.....
a_L1PA2_369_325  .....*Y.....K.....V.....T.....R.....
a_L1PA2_370_326  .....V.....K.....K.....
a_L1PA2_371_327  .....V.....K.....K.....
a_L1PA2_372_328  .....Y.....K.....K.....
a_L1PA2_373_329  .....V.....IK.....
a_L1PA2_376_330  .....P.....N.....
a_L1PA2_377_331  .....P.....Q.....
a_L1PA2_378_332  .....P.....
a_L1PA2_379_333  .....P.....
a_L1PA2_380_334  .....T.....G.....
a_L1PA2_382_335  .....K.....N.....G.....
a_L1PA2_383_336  .....*.....R.....
a_L1PA2_385_337  .....*.....R.....G.....C.....
a_L1PA2_386_338  .....M.....I.....*.....
a_L1PA2_387_339  .....A.....G.....
a_L1PA2_388_340  .....*.....V.....
a_L1PA2_391_341  .....*.....
a_L1PA2_392_342  .....V.....
a_L1PA2_393_343  .....*.....
a_L1PA2_394_344  .....V.....
a_L1PA2_395_345  .....Q.....S.....X.E.....
a_L1PA2_396_346  .....P.....G.....V.....
a_L1PA2_397_347  .....P.....G.....V.....
a_L1PA2_398_348  .....P.....N.....V.....R.....
a_L1PA2_399_349  .....P.....N.....V.....R.....
a_L1PA2_400_350  .....P.....N.....V.....R.....
a_L1PA2_401_351  .....T.....I.....
a_L1PA2_402_352  .....T.....R.....C.....
a_L1PA2_403_353  .....R.....
a_L1PA2_404_354  .....
a_L1PA2_405_355  .....IK.....
a_L1PA2_406_356  .....IK.....
a_L1PA2_407_357  .....M.....
a_L1PA2_408_358  .....K.....G.....
a_L1PA2_409_359  .....K.....G.....
a_L1PA2_410_360  .....X.....
a_L1PA2_411_361  .....K.....I.....
a_L1PA2_412_362  .....I.....
a_L1PA2_413_363  .....Q.....
a_L1PA2_414_364  .....
a_L1PA2_415_365  .....*.....
a_L1PA2_416_366  .....*.....
a_L1PA2_417_367  .....Y.....T.....K.....
b_L1PA2_2_368  .....K.....S.....T.....F.....R.....E.....
b_L1PA2_4_369  .....V.....R.....E.....
b_L1PA2_5_370  .....V.....*.....
b_L1PA2_6_371  .....*.....M.....
b_L1PA2_8_372  .....K.....M.....R.....
b_L1PA2_9_373  .....K.....
b_L1PA2_11_374  .....P.....
b_L1PA2_12_375  .....D.....K.....
b_L1PA2_13_376  .....R.....
b_L1PA2_14_377  .....P.....C.....

```



1.2\_o\_50%\_cn YSELREDIQTKGEVENFEKNLEECITRITNTTEKCLKELMELTKKARELREECRSLRCDQLEERVVSAMEDEMNMKREGKFRKRIKRNEQSLQEIWDY  
b\_L1PA2\_100\_442 -----Y-----Q-----  
b\_L1PA2\_101\_443 .....C..  
b\_L1PA2\_102\_444 .....  
b\_L1PA2\_103\_445 .....Q.....  
b\_L1PA2\_104\_446 .....  
b\_L1PA2\_105\_447 .....N-----  
b\_L1PA2\_106\_448 .....\*-----K.....  
b\_L1PA2\_107\_449 .....  
b\_L1PA2\_108\_450 .....Q.....  
b\_L1PA2\_109\_451 .....  
b\_L1PA2\_110\_452 .....D-----V.....  
b\_L1PA2\_111\_453 .....Q-----I.....  
b\_L1PA2\_112\_454 .....I.....  
b\_L1PA2\_113\_455 .....I-----R.....  
b\_L1PA2\_114\_456 .....V.....  
b\_L1PA2\_115\_457 .....V.....  
b\_L1PA2\_116\_458 .....M.M-----QI.....  
b\_L1PA2\_117\_459 .....  
b\_L1PA2\_118\_460 .....-K...E.....Q-----T.....  
b\_L1PA2\_119\_461 .....A-----F-----I.....  
b\_L1PA2\_120\_462 .....Q.....  
b\_L1PA2\_121\_463 .....K-----R-----V.....  
b\_L1PA2\_122\_464 .....N.....  
b\_L1PA2\_126\_465 .....  
b\_L1PA2\_127\_466 .....K.....  
b\_L1PA2\_128\_467 .....  
b\_L1PA2\_129\_468 .....V-----  
b\_L1PA2\_130\_469 .....K.....  
b\_L1PA2\_131\_470 .....  
b\_L1PA2\_135\_471 .....I-----SS.....  
b\_L1PA2\_141\_472 .....-K.....  
b\_L1PA2\_142\_473 .....X-----G.....  
b\_L1PA2\_143\_474 .....  
b\_L1PA2\_144\_475 .....K-----V-----R.....  
b\_L1PA2\_145\_476 .....  
b\_L1PA2\_146\_477 .....G-----R.K-----N.....  
b\_L1PA2\_147\_478 .....G-----R.K-----N.....  
b\_L1PA2\_148\_479 .....-N.....Q-----K..N-----D.....\*..  
b\_L1PA2\_149\_480 .....\*-----V-----K-----M.....  
b\_L1PA2\_150\_481 .....  
b\_L1PA2\_151\_482 .....\*-----V-----V-----M.G.....\*..  
b\_L1PA2\_152\_483 .....Y..Y.....S-----R.....  
b\_L1PA2\_153\_484 .....F...T.....  
b\_L1PA2\_154\_485 .....E.....S.....A-----V-----Q.....  
b\_L1PA2\_155\_486 .....Y.....  
b\_L1PA2\_157\_487 .....G-----T.....  
b\_L1PA2\_158\_488 .....T.....  
b\_L1PA2\_159\_489 .....E.....H...I.....K-----G-----Q..K.....  
b\_L1PA2\_160\_490 .....P-----K-----Y-----D.....  
b\_L1PA2\_161\_491 .....X.....  
b\_L1PA2\_162\_492 .....V-----I.V-----T.....H...Y..  
b\_L1PA2\_163\_493 .....V.....  
b\_L1PA2\_164\_494 .....R-----  
b\_L1PA2\_165\_495 .....  
b\_L1PA2\_166\_496 .....S.R.....V..  
b\_L1PA2\_167\_497 .....E.....  
b\_L1PA2\_168\_498 .....\*-----V.....  
b\_L1PA2\_169\_499 .....S.....T.....S-----VI..Q.....  
b\_L1PA2\_170\_500 .....I.....G.....  
b\_L1PA2\_172\_501 .....\*.....  
b\_L1PA2\_173\_502 .....GG.....G.....H.....  
b\_L1PA2\_174\_503 .....-D..I.....G.....I-----W-----X.....  
b\_L1PA2\_175\_504 .....K.....R.....E.....K.....  
b\_L1PA2\_176\_505 .....X.....



1.2\_o\_50%\_cn YSELREDIQTKKEVENFEKNLEECITRITNTKCLKELMELKTKARELREECRSLRSCDQLEERVSAEMEDEMNMKREGKFREKRIKRNEQSLQEIWDY  
b\_L1PA2\_178\_506 .....  
b\_L1PA2\_179\_507 .....V.....I.....R.....  
b\_L1PA2\_180\_508 .....I.....  
b\_L1PA2\_181\_509 .....T.....G..  
b\_L1PA2\_182\_510 .....G.....-R.....S.....  
b\_L1PA2\_183\_511 .Y...T.....V.....  
b\_L1PA2\_184\_512 .....K.....  
b\_L1PA2\_185\_513 .....  
b\_L1PA2\_186\_514 .....L.....-D.....  
b\_L1PA2\_187\_515 .....R.....-R.....D.....L..  
b\_L1PA2\_188\_516 .....T.....D.....  
b\_L1PA2\_189\_517 .....D.....R.....  
b\_L1PA2\_190\_518 .....R.....S.....  
b\_L1PA2\_191\_519 .....K.....  
b\_L1PA2\_192\_520 .....  
b\_L1PA2\_193\_521 .....\*D.....I.....  
b\_L1PA2\_194\_522 .....K.....  
b\_L1PA2\_195\_523 .....D.....  
b\_L1PA2\_196\_524 .....T.....V.....F..L..  
b\_L1PA2\_197\_525 .....Y.....I.....  
b\_L1PA2\_198\_526 .....E.....F.....Q.....Q..V..I.....  
b\_L1PA2\_199\_527 .....L.L.....R.....L.....  
b\_L1PA2\_200\_528 .....  
b\_L1PA2\_201\_529 .....D.....\*.....V.....  
b\_L1PA2\_202\_530 .....T.....D.....Q.....K.....  
b\_L1PA2\_203\_531 .....\*.....G..  
b\_L1PA2\_204\_532 .....Q.....  
b\_L1PA2\_205\_533 .....K.....  
b\_L1PA2\_206\_534 .....-K.....K.....-K.....C  
b\_L1PA2\_207\_535 .....P.....T.....  
b\_L1PA2\_208\_536 .....N.....R.....K..V.....  
b\_L1PA2\_209\_537 .....D.....S.....Q.....V.....K..V.....  
b\_L1PA2\_210\_538 .....X.....R.....R.....  
b\_L1PA2\_211\_539 .....I.....  
b\_L1PA2\_212\_540 .D.-.TR.....A.....T.....Y.....\*.....  
b\_L1PA2\_213\_541 .....K.....\*.....Y.....  
b\_L1PA2\_214\_542 .....D.....SI.....  
b\_L1PA2\_215\_543 X.....C.\*.....D.....  
b\_L1PA2\_216\_544 .....  
b\_L1PA2\_217\_545 .....T.....G.N..K.....E.....  
b\_L1PA2\_218\_546 .....V.....R.....V.....G..  
b\_L1PA2\_219\_547 .....V.....G.....G.....I.....T.....  
b\_L1PA2\_220\_548 .....S.....D  
b\_L1PA2\_221\_549 .....  
b\_L1PA2\_223\_550 .....V..  
b\_L1PA2\_224\_551 .....-D.....V.....  
b\_L1PA2\_226\_552 .....P.....T.....P.....I.....I.....Q.....  
b\_L1PA2\_227\_553 .....  
b\_L1PA2\_228\_554 .....R.....  
b\_L1PA2\_229\_555 .....RD.....P.....LVV.....  
b\_L1PA2\_230\_556 .....\*.....Q.....  
b\_L1PA2\_231\_557 .....  
b\_L1PA2\_232\_558 .....  
b\_L1PA2\_233\_559 .....  
b\_L1PA2\_234\_560 .....  
b\_L1PA2\_235\_561 .....  
b\_L1PA2\_236\_562 .....S.....G.....  
b\_L1PA2\_237\_563 .....K.....V.....L.....Q.....F.....  
b\_L1PA2\_238\_564 .....K.....K.....KK.....  
b\_L1PA2\_239\_565 .....R.....I.....  
b\_L1PA2\_240\_566 .....  
b\_L1PA2\_241\_567 .....V.....H.....  
b\_L1PA2\_242\_568 .....S.....  
b\_L1PA2\_243\_569 .....R.....

```

1.2_o_50%_cn      YSELREDIQTGKEVENFEKNLEECITRITNTKELKELMELKTKARELREECRSLRSRCDQLEERVVSAMEDEMNEKREGKFRKRIKRNEQSLQEIWDY
b_L1PA2_244_570  -----^-----^-----^-----^-----^-----^-----^-----^-----^-----^-----^-----^-----^
b_L1PA2_245_571  .....
b_L1PA2_246_572  .....V.....
b_L1PA2_247_573  .....K.....Q.....
b_L1PA2_248_574  .....
b_L1PA2_249_575  .....K.....V.....
b_L1PA2_250_576  .....X.....T.....R.....
b_L1PA2_252_577  .....*.....
b_L1PA2_253_578  .....A.....E.....
b_L1PA2_254_579  .....H.....R.....
b_L1PA2_256_580  .....N.....
b_L1PA2_257_581  .....D.....Y.....I.....*.....
b_L1PA2_258_582  .....
b_L1PA2_259_583  .....Y.....FS-F.....K.....
b_L1PA2_260_584  .....D.....*.....
b_L1PA2_261_585  .....Y.....
b_L1PA2_262_586  .....*.....
b_L1PA2_263_587  .....I.....
b_L1PA2_264_588  .....Q.....
b_L1PA2_265_589  .....E.V.....S.....E.....
b_L1PA2_266_590  .....*.....
b_L1PA2_267_591  .....T.....K.N-D.....M.....
b_L1PA2_268_592  .....A.....L.....K.....
b_L1PA2_269_593  .....
b_L1PA2_270_594  .....D.....K.Y.....V.....I.....K.....
b_L1PA2_271_595  .....Q.S.....
b_L1PA2_272_596  .....A.K.....
b_L1PA2_273_597  .....V.....D.....
b_L1PA2_274_598  .....L.....
b_L1PA2_275_599  .....N.....
b_L1PA2_276_600  .....X-X.....
b_L1PA2_277_601  .....E.....T.....
b_L1PA2_278_602  .....
b_L1PA2_279_603  .....D.....T.....R.....
b_L1PA2_280_604  .....L.....*.....
b_L1PA2_281_605  .....T.....S.....N.....R.....
b_L1PA2_282_606  .....
b_L1PA2_283_607  .....S.....V.....*.....
b_L1PA2_284_608  .....H.....S.....C.....
b_L1PA2_285_609  .....S.....R.....
b_L1PA2_286_610  .....N.....*.....
b_L1PA2_287_611  .....Y.....V.....Y.....
b_L1PA2_288_612  .....N.....
b_L1PA2_289_613  .....
b_L1PA2_290_614  .....D.....-W.....E.....
b_L1PA2_291_615  .....
b_L1PA2_292_616  .....I.....
b_L1PA2_293_617  .....*.....A.....
b_L1PA2_294_618  .....K.....
b_L1PA2_295_619  .....G.....E.....
b_L1PA2_296_620  .....V.....-K.....
b_L1PA2_297_621  .....
b_L1PA2_298_622  .....
b_L1PA2_299_623  .....I.....T.....I.....Q.....
b_L1PA2_300_624  .....-K.....D.....
b_L1PA2_301_625  .....N.....R.S.....
b_L1PA2_302_626  .....Q.....T.....
b_L1PA2_303_627  .....A.....F.....I.....
b_L1PA2_305_628  .....V.....
b_L1PA2_306_629  .....V.....
b_L1PA2_307_630  .....D.....S.-H.....
b_L1PA2_308_631  .....Y.....M.....C.....
b_L1PA2_309_632  .....K.....
b_L1PA2_310_633  .....I.....

```



```

1.2_o_50%_cn YSELREDIQTKGKEVENFEKNLEECITRITNTKCLKELMELKTARELREECRSLRRCQLEERVVSAMEDEMNMKREGKFRKRIKRNEQSLQEIIWDY
b_L1PA2_376_698 -----M.D
b_L1PA2_377_699 .....
b_L1PA2_378_700 .....D.D.....N.....R.....
b_L1PA2_379_701 .....*.A.....T.....
b_L1PA2_380_702 .....R.....D.....R.....
b_L1PA2_381_703 .....*.....
b_L1PA2_382_704 .....I.....
b_L1PA2_383_705 .....H.....
b_L1PA2_384_706 .....V.....S
b_L1PA2_385_707 .....
b_L1PA2_386_708 .....E.....R.....L.....
b_L1PA2_387_709 .....
b_L1PA2_388_710 .....GX.....
b_L1PA2_389_711 .....Q.....R.....
b_L1PA2_390_712 .....
b_L1PA2_391_713 .....R.....G.....
b_L1PA2_392_714 .....Q.....M.....
b_L1PA2_393_715 .....
b_L1PA2_395_716 .....I.....N.....K.....
b_L1PA2_396_717 .....
b_L1PA2_397_718 .....D.....Y.....
b_L1PA2_398_719 .....T.....V.....V.....G.....
b_L1PA2_399_720 .....
b_L1PA2_400_721 .....Q.....
b_L1PA2_401_722 .....
b_L1PA2_402_723 .....*.I.....
b_L1PA2_403_724 .....
b_L1PA2_404_725 .....*.....
b_L1PA2_405_726 .....*.....
b_L1PA2_406_727 .....E.....
b_L1PA2_407_728 .....
b_L1PA2_408_729 .....Q.....
b_L1PA2_409_730 .....
b_L1PA2_410_731 .....C.....K.....
b_L1PA2_411_732 .....
b_L1PA2_412_733 .....K.....
b_L1PA2_413_734 .....I.....
b_L1PA2_414_735 .....
b_L1PA2_415_736 .....
b_L1PA2_416_737 .....
b_L1PA2_417_738 .....X.....S.....
b_L1PA2_418_739 .....K.....K.....
b_L1PA2_419_740 .....H.....
b_L1PA2_420_741 .....
b_L1PA2_421_742 .....P.....
b_L1PA2_422_743 .....
b_L1PA2_423_744 .....
b_L1PA2_424_745 .....N.....
b_L1PA2_425_746 .....
b_L1PA2_426_747 .....
b_L1PA2_427_748 .....
b_L1PA2_428_749 .....
b_L1PA2_429_750 .....
b_L1PA2_430_751 .....
b_L1PA2_431_752 .....G.....
b_L1PA2_432_753 .....XX.....
b_L1PA2_433_754 .....
b_L1PA2_434_755 .....
b_L1PA2_435_756 .....
b_L1PA2_436_757 .....I.....
b_L1PA2_437_758 .....
b_L1PA2_438_759 .....A.....
b_L1PA2_439_760 .....I.....
b_L1PA2_440_761 .....A.....

```

1.2\_o\_50%\_cn YSELREDIQTKKEVENFEKNLEECITRITNTKTELKELMELTKKARELREECRSLRRCQLEERVVSAMEDEMNMKREGKFKREKRIKRNEQSLQEIWY  
b\_L1PA2\_441\_762 .....  
b\_L1PA2\_442\_763 .....  
b\_L1PA2\_443\_764 .....  
b\_L1PA2\_444\_765 .....  
b\_L1PA2\_445\_766 .....  
b\_L1PA2\_446\_767 .....  
b\_L1PA2\_447\_768 .....  
b\_L1PA2\_448\_769 .....  
b\_L1PA2\_449\_770 .....  
b\_L1PA2\_450\_771 .....  
b\_L1PA2\_451\_772 .....  
b\_L1PA2\_452\_773 .....L.....  
b\_L1PA2\_453\_774 .....  
b\_L1PA2\_454\_775 .P.....G.....KE.....  
b\_L1PA2\_455\_776 .....  
b\_L1PA2\_456\_777 .....R.....Q.....V.....  
b\_L1PA2\_457\_778 .....\*.....  
b\_L1PA2\_458\_779 .....  
b\_L1PA2\_459\_780 D.....T.....F.....V.....  
b\_L1PA2\_460\_781 .....Y.....  
b\_L1PA2\_461\_782 .....  
b\_L1PA2\_462\_783 .....C.....G.....  
b\_L1PA2\_463\_784 .....  
b\_L1PA2\_464\_785 .....P.....M.....  
b\_L1PA2\_465\_786 .....  
b\_L1PA2\_466\_787 .....V.....  
b\_L1PA2\_467\_788 .....T.....  
b\_L1PA2\_468\_789 .....HS.....I.....Q.....K.....  
b\_L1PA2\_469\_790 .....V.....  
b\_L1PA2\_470\_791 .....  
b\_L1PA2\_471\_792 .....  
b\_L1PA2\_472\_793 .....  
b\_L1PA2\_473\_794 .....L.....A.....  
b\_L1PA2\_474\_795 .....  
b\_L1PA2\_475\_796 .....  
b\_L1PA2\_476\_797 .....I.....Q.....G.....  
b\_L1PA2\_477\_798 .....V.....K.....  
b\_L1PA2\_478\_799 .....  
b\_L1PA2\_479\_800 .....P.....T.....  
b\_L1PA2\_481\_801 .....  
b\_L1PA2\_482\_802 .....  
b\_L1PA2\_483\_803 .....K.....T.....  
b\_L1PA2\_484\_804 .....  
b\_L1PA2\_485\_805 .....T.....  
b\_L1PA2\_486\_806 .....\*.....G.....  
b\_L1PA2\_487\_807 .....I.....K.....X.....N.....  
b\_L1PA2\_489\_808 .....K.....  
b\_L1PA2\_490\_809 .....  
b\_L1PA2\_491\_810 .....\*.....  
b\_L1PA2\_492\_811 .....D.....T.....D.....  
b\_L1PA2\_493\_812 .....  
b\_L1PA2\_494\_813 .....R.....  
b\_L1PA2\_496\_814 .....V.....  
b\_L1PA2\_498\_815 .....  
b\_L1PA2\_499\_816 .....V.....  
b\_L1PA2\_500\_817 .....  
b\_L1PA2\_501\_818 .....K.....T.....  
b\_L1PA2\_502\_819 .....  
b\_L1PA2\_503\_820 .....  
b\_L1PA2\_504\_821 .....T.....R.....  
b\_L1PA2\_506\_822 .....  
b\_L1PA2\_507\_823 .....H.....\*.....  
b\_L1PA2\_508\_824 .....V.....  
b\_L1PA2\_509\_825 .....W.....
