# Supplementary material for: Cryptic genetic variation enhances primate L1 retrotransposon survival by enlarging the functional coiled coil sequence space of ORF1p
Source: PubMed Central journal article supplement (PMC7449397; doi:10.1371/journal.pgen.1008991), 2020-08-14
Supplement: pgen.1008991.s011.pdf [file pgen.1008991.s011.pdf]

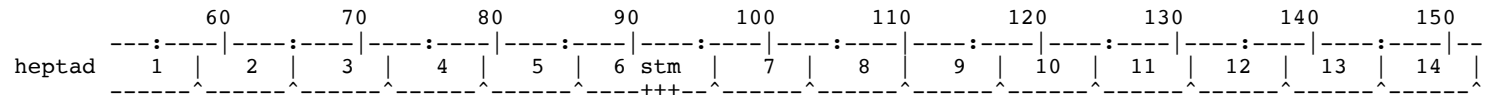

abcdefgabcdefgabcdefgabcdefgabcdefgabcdefgabcdefgabcdefgabcdefgabcdefgabcdefgabcdefgabcdefgabcdefgabcdefg  
 YS-L-EDIQTKGKEVENFEKNLEECITRITNTEKCLKELMELKTKA-EL-EECRSLRS-CDQLEERVVS-MEDEMNEMK-EGKFREKRIKRN-QSLQEIW DY

1.3\_o\_50%\_cn

cL1.1\_50%\_cn\_1: ..E.....A.....E.....  
 cL1.2\_50%\_cn\_2: ..E.....E.....  
 3\_chr3\_691-cL1\_3: .....N.....S.....  
 3\_chr9\_1178-cL1\_4: .....K.....X.X.....  
 3\_chr12\_222-cL1\_5: .....I.V.....  
 3\_chrX\_1343-cL1\_6: .....T.....N.....  
 3\_chr5\_892-cL1\_7: .....V.....S.....  
 3\_chr8\_1188-cL1\_8: .....V.....N.....  
 3\_chr9\_1167-cL1\_9: .....F.....  
 3\_chr13\_382-cL1\_10: .....L.....  
 3\_chr3\_581-cL1\_11: .....L.....N.....L.....V.....G.....  
 3\_chr10\_170-cL1\_12: .....KE.....Y.....ND..P.....I.....  
 3\_chr11\_192-cL1\_13: .....X.....K.....  
 3\_chr5\_851-cL1\_14: .....I.....F.....  
 3\_chrX\_1268-cL1\_15: .....N.....R.....V.....X.X.....  
 3\_chr3\_688-cL1\_16: .....A.....  
 3\_chrX\_1289-cL1\_17: .....Q.....Y.....Q.....M.....  
 3\_chr10\_178-cL1\_18: ..T.....R.....  
 3\_chr16\_469-cL1\_19: .....E.....S..Y.....V.....X--X.S.....  
 3\_chrX\_1275-cL1\_20: .....A.....A.....N.....  
 3\_chr5\_821-cL1\_21: ...Q..E.....X.K.....E..A...H...V.....  
 3\_chrX\_1269-cL1\_22: ...E..X-...S...A...T...V.....  
 3\_chr5\_871-cL1\_23: ..Y.....  
 3\_chr5\_880-cL1\_24: .....  
 3\_chr8\_1044-cL1\_25: .....K.....A.....T.....  
 3\_chr14\_386-cL1\_26: .....\*...K.....A.I.....  
 3\_chr2\_595-cL1\_27: .....Y.....  
 3\_chr5\_841-cL1\_28: .A.V.....\*...N...K.....T.....  
 3\_chr3\_667-cL1\_29: .....I.....  
 3\_chr14\_392-cL1\_30: .....\*T.....  
 3\_chr1\_73-cL1\_31: .....S.....V.....  
 3\_chr7\_1057-cL1\_32: .....D..S.....  
 3\_chrY\_1303-cL1\_33: H.....I...\*...X.K.....K.....F.G.N.Y.W.....M.....H.....  
 3\_chr22\_549-cL1\_34: .....E..I.....Q.S..R.....L.....N.....V.....N.....  
 3\_chr16\_405-cL1\_35: .....Y.....Q.....X.....  
 3\_chr4\_776-cL1\_36: .....  
 3\_chr2\_494-cL1\_37: .....X.....Y.....  
 3\_chr19\_402-cL1\_38: .....G.....R.....Q.....H..QK...E.....  
 3\_chr9\_1186-cL1\_39: .....I.....N.....N.....S.....  
 3\_chr2\_479-cL1\_40: .....K.....K.....N.....  
 3\_chr2\_465-cL1\_41: .....E.....Q.....S.\*...D.....XX.....A.....T.....  
 3\_chrX\_1358-cL1\_42: .....  
 3\_chr2\_539-cL1\_43: .....A.....VES.....P.....N.....  
 3\_chr1\_45-cL1\_44: .....A.X.....ID.....V.....N.....T.....  
 3\_chrX\_1323-cL1\_45: .....N.....S.S.....K.E.....C.....T.....\*.....S.....  
 3\_chr6\_980-cL1\_46: .....I.....  
 3\_chr3\_693-cL1\_47: .....T.....G.....Q.....  
 3\_chr16\_445-cL1\_48: .....E.....X.....M.....P.....N.....  
 3\_chr7\_1091-cL1\_49: .....\*.....  
 3\_chr6\_846-cL1\_50: .....S.....I.....D.....V.....  
 3\_chr7\_1079-cL1\_51: .....R.....  
 3\_chr4\_766-cL1\_52: .....V.....T.....G.....\*.....  
 3\_chr6\_982-cL1\_53: .....  
 3\_chr6\_909-cL1\_54: .....E.....D..K.....  
 3\_chr10\_183-cL1\_55: .....R.....Q.....  
 3\_chr9\_1191-cL1\_56: .....I.....S.....X.....LH.....  
 3\_chr5\_874-cL1\_57: .....I.....N...K.....



1.3\_o\_50\_cn      YS-L-EDIQTKGKEVENFEKNLEECITRINTWTEKLMELKTKA-EL-EECRSLRS-CDQLEERVS-MEDEMNMK-EGKFREKRIKRN-QSLQEIWDY

3\_chrX\_1206-cL1\_122: .....S.....K...R...N...V...V.....

3\_chr6\_945-cL1\_123: .....I...G.....G...R...N...V...V.....

3\_chr2\_559-cL1\_124: .....F.....R.....

3\_chr7\_952-cL1\_125: .....A.....K.....V.....I.....G.....

3\_chr10\_76-cL1\_126: .....K.....FR.....I.....I.....I.....I.....

3\_chr8\_1081-cL1\_127: .....N.....N.....\*...I.....

3\_chr3\_625-cL1\_128: .....X.....\*...H.....

3\_chrX\_1287-cL1\_129: N.....S.....S.....N.....

3\_chr9\_1158-cL1\_130: .....E.N.....K.....R.....S.....K.....H.....

3\_chr20\_591-cL1\_131: .....H.....K.....K.....

3\_chr3\_686-cL1\_132: .....K.....L.....

3\_chr11\_186-cL1\_133: .....X.....L.....V.....

3\_chr4\_765-cL1\_134: .....DK.....E.....G.....

3\_chr10\_175-cL1\_135: .....S.....

3\_chr10\_180-cL1\_136: C.....

3\_chr7\_1074-cL1\_137: .....T.....R.....

3\_chr10\_90-cL1\_138: .....A.....S.....

3\_chr4\_689-cL1\_139: .....K...S...G.....

3\_chr15\_398-cL1\_140: .....V.....N...I.K...T.....

3\_chr2\_480-cL1\_141: .....KY.....

3\_chr6\_948-cL1\_142: ...Q.....K.....

3\_chr12\_278-cL1\_143: .....X-X.....

3\_chr12\_290-cL1\_144: .....R.....G.....

3\_chr14\_347-cL1\_145: .....R.....G.....

3\_chr8\_1179-cL1\_146: .....\*...K.....

3\_chr6\_960-cL1\_147: .....R.\*.....

3\_chr9\_1125-cL1\_148: .....EK.....Y...Q.....K.....T.....C.H

3\_chr11\_182-cL1\_149: .....TR.....A...T.....L.....

3\_chr3\_680-cL1\_150: .....D.....R.....

3\_chrX\_1221-cL1\_151: .....\*...R...Q...P...R.....\*..

3\_chr1\_71-cL1\_152: .....I.....X...S.....H.....

3\_chrX\_1239-cL1\_153: F.....X.....

3\_chr12\_280-cL1\_154: .....T.\*.....

3\_chr7\_1087-cL1\_155: .....L.....\*...N.....

3\_chr11\_122-cL1\_156: .....L.....\*...N.....

3\_chr10\_94-cL1\_157: .....\*...N.....

3\_chr8\_1147-cL1\_158: .....V.....\*...N.....

3\_chr16\_457-cL1\_159: P.....S.....N...\*...E...D...G.....

3\_chr10\_96-cL1\_160: .....S.....E...D...G.....

3\_chr8\_1152-cL1\_161: .....E.....R.....

3\_chr2\_568-cL1\_162: .....E.....R.....

3\_chr14\_346-cL1\_163: .....Q.....Q.....I.....T.\*.....

3\_chr18\_488-cL1\_164: .....N.....W...\*.....

3\_chr19\_413-cL1\_165: .....I.....W...\*.....

3\_chr21\_545-cL1\_166: .....Q.....

3\_chr2\_552-cL1\_167: .....S.....M.....

3\_chr2\_584-cL1\_168: .....N...V...Q.....

3\_chr5\_858-cL1\_169: ...Q.....I...R...N...S...I...\*.....

3\_chr5\_833-cL1\_170: .....N...G.....N.N...I...I...D...E.....

3\_chr10\_166-cL1\_171: .....E.....D...S.....T...V.....

3\_chr3\_694-cL1\_172: .....S...H.....

3\_chr16\_456-cL1\_173: .....T.....K--D...E.....

3\_chr2\_572-cL1\_174: .....I.....

3\_chr2\_551-cL1\_175: .....R.G.....I...G.....

3\_chr13\_370-cL1\_176: .....F.....R.....

3\_chr7\_971-cL1\_177: .....SS.Y...A.Q.....A.\*.V.....

3\_chrX\_1356-cL1\_178: .....T.....

3\_chr2\_575-cL1\_179: .....R.....

3\_chr6\_972-cL1\_180: .....K.....

3\_chr10\_167-cL1\_181: .....E...I...S.S...R...L...E.....

3\_chr3\_695-cL1\_182: .....K.S...H.....

3\_chr12\_298-cL1\_183: .....N.....

3\_chr9\_1181-cL1\_184: .....N.....

3\_chr4\_782-cL1\_185: .....P.....K.....









1.3\_o\_50%\_cn      YS-L-EDIQTKGKEVENFEKNLEECITRINTWTEKCLKELMELKTKA-EL-EECRSLRS-CDQLEERVS-MEDEMNMK-EGKFREKRIKRN-QSLQEIWDY

3\_chr6\_947-cL1\_443: .....M.....N.\*.....C

3\_chr5\_879-cL1\_444: .....\*.....N...G...Q.....

3\_chr5\_770-cL1\_445: .....SY.....V.....X.....

3\_chr6\_953-cL1\_446: .....R.....I..I.....R.....

3\_chr8\_1143-cL1\_447: .....R.....Q.....I.....V.....\*

3\_chrX\_1341-cL1\_448: .....I.....N...S.....

3\_chr8\_1137-cL1\_449: .....X.Y.....RD.....K.G...N.....

3\_chr17\_490-cL1\_450: .....M.....S.....I.....R.....N.....

3\_chr7\_988-cL1\_451: .....R.....R.....A...T.....

3\_chr5\_837-cL1\_452: .....R.....R.....A...T.....

3\_chr9\_1164-cL1\_453: .....N.....C.....

3\_chr15\_468-cL1\_454: .....N.....C.....

3\_chr11\_157-cL1\_455: .....S.....T.H.....

3\_chr4\_732-cL1\_456: .....R.....

3\_chr1\_100-cL1\_457: .....G.....

3\_chr2\_544-cL1\_458: .....ET.....K...SV...K...F.....N.....V.....

3\_chr10\_130-cL1\_459:\*.....E.....S.....A.....L...V.....

3\_chr1\_47-cL1\_460: .....E.....N.....N.....

3\_chr5\_869-cL1\_461: .....S.....K.R...C...N...L...V.....

3\_chr14\_362-cL1\_462: ..P.....D.....N.....E.....L...S...K.XI.....

3\_chr7\_1085-cL1\_463: .....R.....LR..

3\_chr9\_1168-cL1\_464: .....L...G.....N...R..

3\_chr1\_85-cL1\_465: .....L...G.....N...R..

3\_chr15\_366-cL1\_466: .....E.....Y..S.....N.....P.....K.....Y..V.....V.....

3\_chr8\_1045-cL1\_467: .....E.....Y..S.....N.....P.....K.....Y..V.....V.....

3\_chr7\_1048-cL1\_468: .....D.....R.....F\*..H.....

3\_chr10\_156-cL1\_469: .....D.....R.....F\*..H.....

3\_chr13\_380-cL1\_470: .....D.....R.....F\*..H.....

3\_chr6\_986-cL1\_471: C.....S.....K.....

3\_chr14\_363-cL1\_472: .....DG.....V.....N.....

3\_chr8\_1069-cL1\_473: .....G.....A.....A.....N.....

3\_chr4\_772-cL1\_474: .....G.....A.....A.....N.....

3\_chrX\_1331-cL1\_475: .....\*.....D.W.....K.....R.....

3\_chr9\_1163-cL1\_476: .....D.....E.....

3\_chr15\_418-cL1\_477: .....D.....I.....H.....XX.....

3\_chr15\_372-cL1\_478: .....V..D.....

3\_chr5\_876-cL1\_479: .....T.....L.....D.....R.....R.....

3\_chr10\_72-cL1\_480: .....R..K.....R...\*\*

3\_chr12\_273-cL1\_481: .....C.....I.....V.T.....\*

3\_chr14\_361-cL1\_482: .....E.....LX.S...Y...I..F.....A.....V.....

3\_chr2\_483-cL1\_483: .....K.....P.....K.....

3\_chrX\_1205-cL1\_484: .....\*..L..S.....IG.....N.....L.....I.....

3\_chr7\_1070-cL1\_485: .....I.....I.....I.....T..K.....N.....

3\_chr11\_187-cL1\_486: .....E.....C..S.....R.....V.....T.....

3\_chr15\_369-cL1\_487: .....E.....C..S.....R.....V.....T.....

3\_chr17\_472-cL1\_488: .....L.....---D.....

3\_chr13\_379-cL1\_489: .....D.....K.....\*

3\_chr6\_970-cL1\_490: .....D.....K.....\*

3\_chrX\_1258-cL1\_491: .....E.....N.....I.....M.....T.....M\*..

3\_chr11\_196-cL1\_492: .....S.....

3\_chr6\_934-cL1\_493: .....E.....S.....V.....

3\_chrX\_1251-cL1\_494: .....K.....G.....H..X.....R.....

3\_chr4\_763-cL1\_495: .....K.....G.....H..X.....R.....

3\_chr6\_987-cL1\_496: .....T.....S.....

3\_chr11\_176-cL1\_497: .....V.....D..A.....I.....

3\_chr15\_365-cL1\_498: .....K..KI..Q.....\*.....D.....R.....V.....K.....

3\_chr3\_649-cL1\_499: .....L.....T.....K..I.....

3\_chr2\_464-cL1\_500: .....R.....D.....C.....

3\_chr9\_1122-cL1\_501: .....\*.....S.....T.....V.....V.....V.....

3\_chr7\_1043-cL1\_502: .....R..X.....M.....

3\_chr1\_70-cL1\_503: ..P...ET.....S.\*...W.....P.....V.....T.....

3\_chr11\_179-cL1\_504: .....R.....I.....

3\_chr14\_395-cL1\_505: .....X--X.....

3\_chr9\_1146-cL1\_506: .....S.....W.....V.....
