# Supplementary material for: Cryptic genetic variation enhances primate L1 retrotransposon survival by enlarging the functional coiled coil sequence space of ORF1p
Source: PLoS Genet. 2020 Aug 14;16(8):e1008991. doi: 10.1371/journal.pgen.1008991 (PMC7449397; doi:10.1371/journal.pgen.1008991)
Supplement: S10 Fig — Alignment of L1Pa2 CG-null coiled coil peptide sequences that lack F at position 134 vs the 50% consensus sequence of L1Pa2. (PDF) [file pgen.1008991.s010.pdf]

|                | 60                                                                                                                                                                                                       | 70 | 80 | 90 | 100 | 110 | 120 | 130 | 140 | 150 |    |    |    |    |
|----------------|----------------------------------------------------------------------------------------------------------------------------------------------------------------------------------------------------------|----|----|----|-----|-----|-----|-----|-----|-----|----|----|----|----|
| heptad         | 1                                                                                                                                                                                                        | 2  | 3  | 4  | 5   | 6   | 7   | 8   | 9   | 10  | 11 | 12 | 13 | 14 |
|                | ----- ----- ----- ----- ----- ----- ----- ----- ----- ----- ----- ----- ----- ----- -----                                                                                                                |    |    |    |     |     |     |     |     |     |    |    |    |    |
|                | +++++                                                                                                                                                                                                    |    |    |    |     |     |     |     |     |     |    |    |    |    |
| 2ab_50_cns     | abcdefgabcdefgabcdefgabcdefgabcdbcddefgabcdefgabcdefgabcdefgabcdefgabcdefgabcdefgabcdefgabcdefg<br>YSELREDIQTKGKEVENFEKNLEECITRITNTTEKCLKELMELKTKARELREECRSLRSRCDQLEERVSAMEDEMNMKREGKFREKRIKRNEQSLQEIWDY |    |    |    |     |     |     |     |     |     |    |    |    |    |
| a_L1PA2_4_1    | ...P-KEVR.H...K.L..K.D.WL....A..S..D.....TT--D..T..S.-F.....V.K.Q.....-K.C...V...KK.....                                                                                                                 |    |    |    |     |     |     |     |     |     |    |    |    |    |
| a_L1PA2_37_2   | .....V.....                                                                                                                                                                                              |    |    |    |     |     |     |     |     |     |    |    |    |    |
| a_L1PA2_49_3   | .....A.....H.....V.....                                                                                                                                                                                  |    |    |    |     |     |     |     |     |     |    |    |    |    |
| a_L1PA2_72_4   | .....D.....S.....                                                                                                                                                                                        |    |    |    |     |     |     |     |     |     |    |    |    |    |
| a_L1PA2_84_5   | .....K.....V.....                                                                                                                                                                                        |    |    |    |     |     |     |     |     |     |    |    |    |    |
| a_L1PA2_88_6   | .....G.....Y.....                                                                                                                                                                                        |    |    |    |     |     |     |     |     |     |    |    |    |    |
| a_L1PA2_115_7  | .A.....P...N.....V.....S.....R.....                                                                                                                                                                      |    |    |    |     |     |     |     |     |     |    |    |    |    |
| a_L1PA2_122_8  | .....N.....V.....R.SI.....                                                                                                                                                                               |    |    |    |     |     |     |     |     |     |    |    |    |    |
| a_L1PA2_129_9  | .....K.....M.....G.NF.....A.....S.....                                                                                                                                                                   |    |    |    |     |     |     |     |     |     |    |    |    |    |
| a_L1PA2_130_10 | .....K.....Q.....M.....G.N.....A.....S.....K.....                                                                                                                                                        |    |    |    |     |     |     |     |     |     |    |    |    |    |
| a_L1PA2_133_11 | .Q.....KN.....W.....D.....S.....R.....                                                                                                                                                                   |    |    |    |     |     |     |     |     |     |    |    |    |    |
| a_L1PA2_138_12 | .....Q.....D.....I.V.....S.....                                                                                                                                                                          |    |    |    |     |     |     |     |     |     |    |    |    |    |
| a_L1PA2_139_13 | .....S.....Y.QT...K.....                                                                                                                                                                                 |    |    |    |     |     |     |     |     |     |    |    |    |    |
| a_L1PA2_159_14 | .....D.....P.....S.....                                                                                                                                                                                  |    |    |    |     |     |     |     |     |     |    |    |    |    |
| a_L1PA2_173_15 | .....V.....S.....                                                                                                                                                                                        |    |    |    |     |     |     |     |     |     |    |    |    |    |
| a_L1PA2_175_16 | .....G.....*.X.....S.E.....                                                                                                                                                                              |    |    |    |     |     |     |     |     |     |    |    |    |    |
| a_L1PA2_186_17 | .....G.....L.....A.....                                                                                                                                                                                  |    |    |    |     |     |     |     |     |     |    |    |    |    |
| a_L1PA2_187_18 | .....G.....L.....A.....                                                                                                                                                                                  |    |    |    |     |     |     |     |     |     |    |    |    |    |
| a_L1PA2_200_19 | .....D.....S.....                                                                                                                                                                                        |    |    |    |     |     |     |     |     |     |    |    |    |    |
| a_L1PA2_215_20 | .....S.....                                                                                                                                                                                              |    |    |    |     |     |     |     |     |     |    |    |    |    |
| a_L1PA2_218_21 | .....S.....M.....L.....                                                                                                                                                                                  |    |    |    |     |     |     |     |     |     |    |    |    |    |
| a_L1PA2_245_22 | .....-R.....S.....                                                                                                                                                                                       |    |    |    |     |     |     |     |     |     |    |    |    |    |
| a_L1PA2_249_23 | .....S.....D.....S.....                                                                                                                                                                                  |    |    |    |     |     |     |     |     |     |    |    |    |    |
| a_L1PA2_265_24 | .....S.....*                                                                                                                                                                                             |    |    |    |     |     |     |     |     |     |    |    |    |    |
| a_L1PA2_274_25 | .....S.....                                                                                                                                                                                              |    |    |    |     |     |     |     |     |     |    |    |    |    |
| a_L1PA2_292_26 | .....S.....                                                                                                                                                                                              |    |    |    |     |     |     |     |     |     |    |    |    |    |
| a_L1PA2_301_27 | .....S.....                                                                                                                                                                                              |    |    |    |     |     |     |     |     |     |    |    |    |    |
| a_L1PA2_302_28 | .T.....G.....L...X.....P.....                                                                                                                                                                            |    |    |    |     |     |     |     |     |     |    |    |    |    |
| a_L1PA2_310_29 | .....E.....T.....V.....                                                                                                                                                                                  |    |    |    |     |     |     |     |     |     |    |    |    |    |
| a_L1PA2_315_30 | .....E.....V.....M.....S.....                                                                                                                                                                            |    |    |    |     |     |     |     |     |     |    |    |    |    |
| a_L1PA2_316_31 | .....X.....S.....L.....                                                                                                                                                                                  |    |    |    |     |     |     |     |     |     |    |    |    |    |
| a_L1PA2_318_32 | .....K.....V.....                                                                                                                                                                                        |    |    |    |     |     |     |     |     |     |    |    |    |    |
| a_L1PA2_323_33 | .....S.....                                                                                                                                                                                              |    |    |    |     |     |     |     |     |     |    |    |    |    |
| a_L1PA2_326_34 | .....A.....S.....                                                                                                                                                                                        |    |    |    |     |     |     |     |     |     |    |    |    |    |
| a_L1PA2_328_35 | .....I.....L.....                                                                                                                                                                                        |    |    |    |     |     |     |     |     |     |    |    |    |    |
| a_L1PA2_333_36 | .....A.....I.....W..A.....K.....S.....L.....                                                                                                                                                             |    |    |    |     |     |     |     |     |     |    |    |    |    |
| a_L1PA2_337_37 | .....I.....T.....S.....                                                                                                                                                                                  |    |    |    |     |     |     |     |     |     |    |    |    |    |
| a_L1PA2_338_38 | .....K.....V.....S.....                                                                                                                                                                                  |    |    |    |     |     |     |     |     |     |    |    |    |    |
| a_L1PA2_351_39 | .....G.....S.....                                                                                                                                                                                        |    |    |    |     |     |     |     |     |     |    |    |    |    |
| a_L1PA2_354_40 | ...I.....I...*-.....S.....R.....                                                                                                                                                                         |    |    |    |     |     |     |     |     |     |    |    |    |    |
| a_L1PA2_355_41 | .....-X-.....S.....                                                                                                                                                                                      |    |    |    |     |     |     |     |     |     |    |    |    |    |
| a_L1PA2_361_42 | .....N.....R.....S.....                                                                                                                                                                                  |    |    |    |     |     |     |     |     |     |    |    |    |    |
| a_L1PA2_363_43 | .....V.....S.....                                                                                                                                                                                        |    |    |    |     |     |     |     |     |     |    |    |    |    |
| a_L1PA2_374_44 | .....*-Q.....S.....                                                                                                                                                                                      |    |    |    |     |     |     |     |     |     |    |    |    |    |
| a_L1PA2_375_45 | .....V.....S.....                                                                                                                                                                                        |    |    |    |     |     |     |     |     |     |    |    |    |    |
| a_L1PA2_381_46 | .....*.....S.....                                                                                                                                                                                        |    |    |    |     |     |     |     |     |     |    |    |    |    |
| a_L1PA2_384_47 | ...-K...E.....K.....S.....R.....                                                                                                                                                                         |    |    |    |     |     |     |     |     |     |    |    |    |    |
| a_L1PA2_389_48 | .....K.....S.K.....                                                                                                                                                                                      |    |    |    |     |     |     |     |     |     |    |    |    |    |
| a_L1PA2_390_49 | .....S.....                                                                                                                                                                                              |    |    |    |     |     |     |     |     |     |    |    |    |    |
| b_L1PA2_3_50   | .....D.....A.V.....*                                                                                                                                                                                     |    |    |    |     |     |     |     |     |     |    |    |    |    |
| b_L1PA2_7_51   | .....V.....I.....D.....V.....*                                                                                                                                                                           |    |    |    |     |     |     |     |     |     |    |    |    |    |
| b_L1PA2_10_52  | .....D.....V.A.T.....K.....                                                                                                                                                                              |    |    |    |     |     |     |     |     |     |    |    |    |    |
| b_L1PA2_15_53  | .....V.....                                                                                                                                                                                              |    |    |    |     |     |     |     |     |     |    |    |    |    |
| b_L1PA2_16_54  | ..D.....V.....                                                                                                                                                                                           |    |    |    |     |     |     |     |     |     |    |    |    |    |
| b_L1PA2_18_55  | .....V.....                                                                                                                                                                                              |    |    |    |     |     |     |     |     |     |    |    |    |    |
| b_L1PA2_20_56  | .....S.....V.....                                                                                                                                                                                        |    |    |    |     |     |     |     |     |     |    |    |    |    |
| b_L1PA2_22_57  | .....I.....V.....                                                                                                                                                                                        |    |    |    |     |     |     |     |     |     |    |    |    |    |

[illegible]
